# Supplementary material for: Bridging Gaps in HDR Improvement: The Role of MAD2L2, SCAI, and SCR7
Source: MDPI journal article supplement (doi:10.3390/ijms24076704), 2023-04-04
Supplement: s1 [file s1]

## Supplementary Materials

### *Selection of siRNA for MAD2L2 knockdown*

Three small interfering RNAs (siRNAs) were designed for the NM\_001127325.2 isoform of *MAD2L2* that consists of 8 coding exons and encodes a 211 aa protein. The siRNA\_MAD2L2\_1 sequence is located at the border of the first (non-coding) and second exons of the transcript, siRNA\_MAD2L2\_2 and siRNA\_MAD2L2\_3 are both complementary to the last exon (Figure S1). These two siRNAs have deoxythymidine residues at the 3'-end of the strand, and siRNA\_MAD2L2\_1 has a double uracil residue. Transfection of siRNA was performed with the TurboFect™ Transfection Reagent (Thermo Fisher Scientific, USA). Cells were analyzed 24 h after transfection.

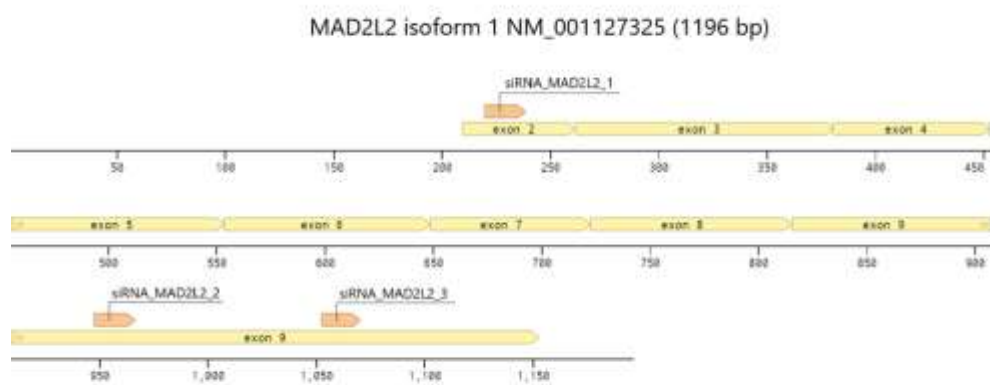

**Figure S1.** MAD2L2 and anti-MAD2L2 siRNAs. First exon is non-coding and isn't shown.

Transfection efficacy (97.1%) was measured using a FAM-labeled siRNA (siRNA\_flu) with a sequence that was non-specific for the human genome. Negative controls included untransfected cells, cells with transfection reagent only (Turbofect), and cells transfected with siRNA\_flu. MAD2L2 expression in the cells transfected with siRNA\_flu was set to 1 and other samples were compared to it. Cells at all conditions showed the same normal survival 24h after transfection (data not shown). All 3 anti-MAD2L2 siRNAs demonstrated expression knockdown down to 0.3 ( $p=0.012$ ), 0.09 ( $p=0.017$ ), and 0.1 ( $p=0.017$ ) compared to MAD2L2 expression in the cells transfected with siRNA\_flu (Figure S2). siRNA\_MAD2L2\_2 demonstrated more than 10-fold knockdown and was selected for further experiments; it is called as siRNA\_MAD2L2 in the main text.

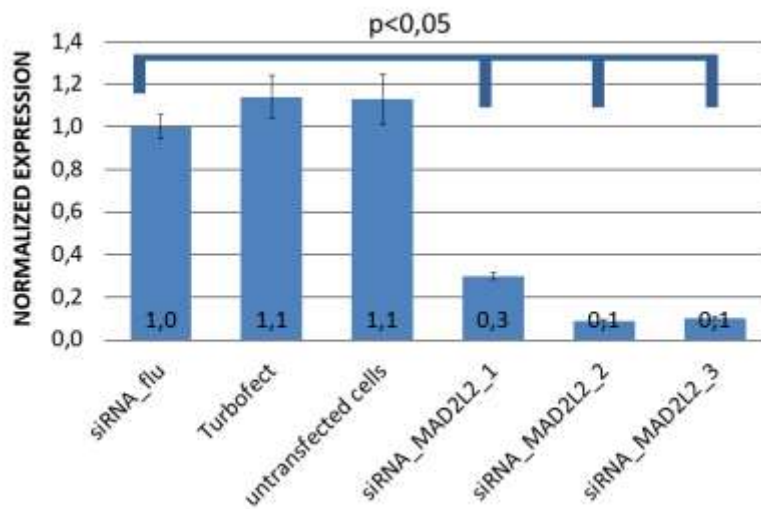

**Figure S2.** Expression of *MAD2L2* mRNA. Data is represented as mean and 95% CI, differences in expression levels were analyzed using the Mann-Whitney test. More details are in the text.

We also confirmed that *MAD2L2* influences its protein level. We stained the cells with anti-*MAD2L2* antibodies and demonstrated that the number of *MAD2L2* positive cells decreased 1.8-fold 24 h after transfection compared to control samples exposed to Turbofect only (S3 Fig).

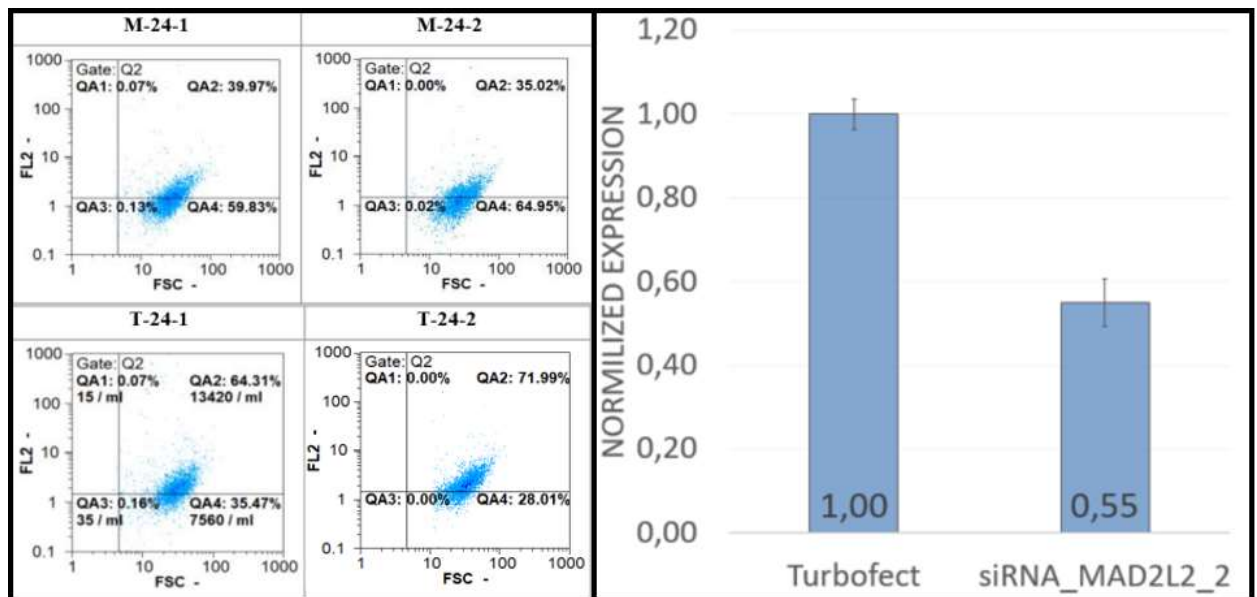

**Figure S3.** *MAD2L2* protein knockdown with siRNA\_MAD2L2. *MAD2L2* was stained with primary (Recombinant AntiMad2L2/REV7 antibody [EPR13657], Abcam, UK) and secondary antibodies (Alexa Fluor 594 goat anti-rabbit IgG (H+L), Invitrogen, USA). A - Dot plot generated by the Flomax software; forward side scatter is along the X axis, fluorescent intensity, FL2, is along the y axis. M-24-1, M-24-2 – cells with knockdown of *MAD2L2*, 24 h after transfection, T-24-1, T-24-2 - control cells exposed to Turbofect only, 24 h after transfection. B – Proportion of *MAD2L2*-positive cells after *MAD2L2* knockdown. Mean and 95% CI. \*  $p < 0.05$ .

#### *Verification of Cas9-SCAI expression*

Cas9-SCAI expression was confirmed by staining SCAI with primary (recombinant Anti-SCAI antibody [EPR4128] (ab124688), Abcam, UK) and secondary antibodies (Alexa Fluor 594 goat anti-rabbit IgG (H+L), Invitrogen, USA) 48 h after transfection with the Cas9-SCAI vector. Analysis of 62,959 cells transfected with Cas9-SCAI and 14,577 cells transfected with Cas9 only (control) confirmed that SCAI exhibits nuclear localization (S6 Fig) and its expression level is 12% higher in cells transfected with Cas9-SCAI ( $p=0.0001$ ).

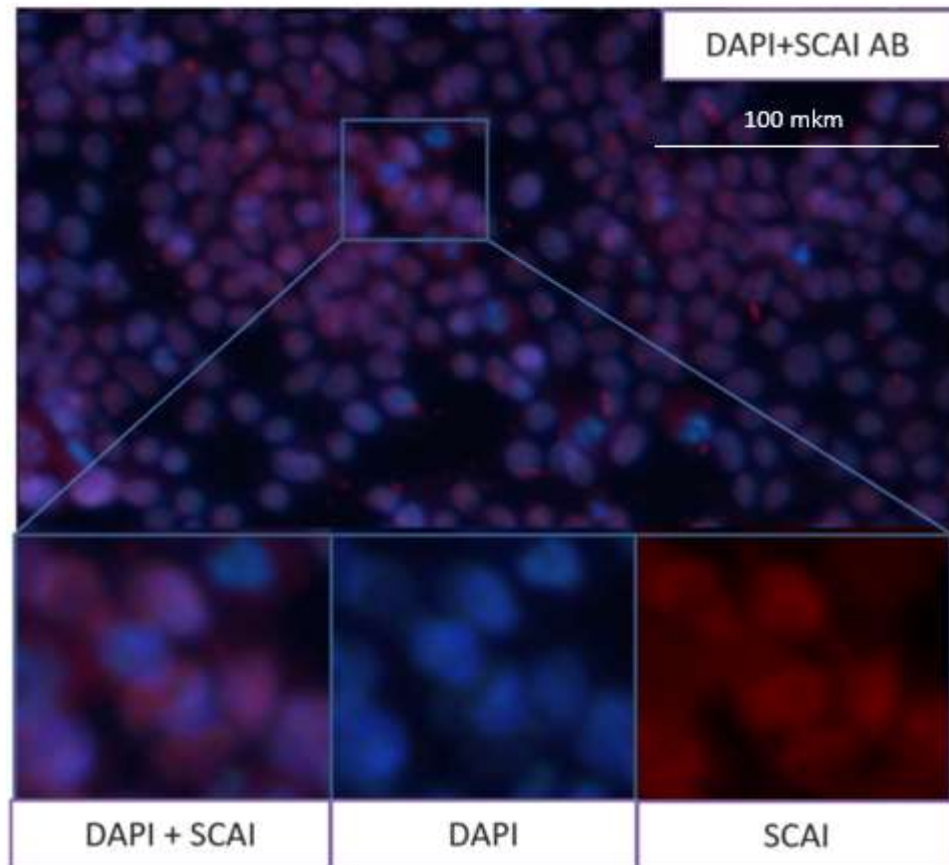

**Figure S4.** SCAI is localized in the nuclei of the transfected HEK293 cells stained with Anti-SCAI antibodies (SCAI AB) and DAPI.

#### *SCR7: choosing optimal time and concentration*

SCR7 which inhibits ligase IV was added to transfected cells at the time of transfection or 24 h before. Cells were transfected with the Cas9 to restore the *eGFP* gene by HDR. The number of GFP+ cells was 1.8 times higher ( $p=0.009$ ) when exposed to SCR7 simultaneously with Cas9-sgRNA/ssODN transfection, while the administration of SCR7 24 h prior to transfection even reduced the number of successfully edited cells (by 2.4 times,  $p=0.009$ ) (S4 Fig).

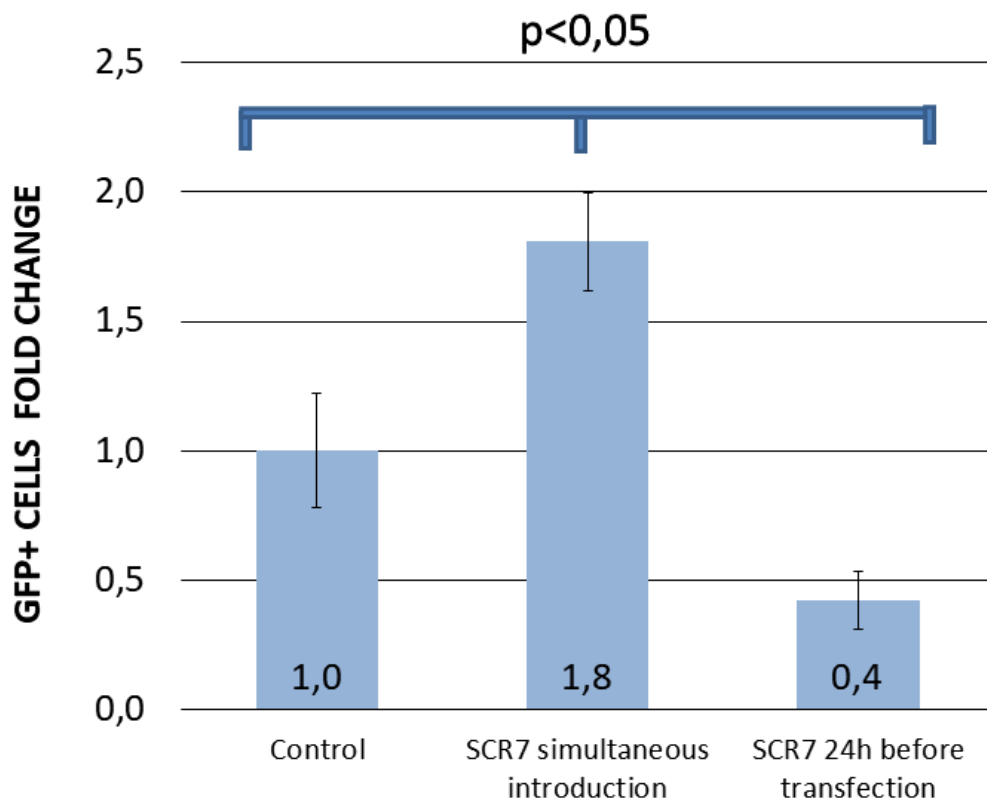

**Figure S5.** Influence of SCR7 added at different time points on the number of GFP+ cells after genome editing by Cas9-sgRNA/ssODN. Mean and 95% CI.

Next we added SCR7 at 4 different concentrations simultaneously with transfection. All of them were efficient in increasing the HDR efficiency (S5 Fig), there were no differences between different concentrations ( $p > 0.4$ ). There was also no difference in cell survival (data not shown); the concentration of 1  $\mu\text{M}$  was chosen as the most frequently used by other authors.

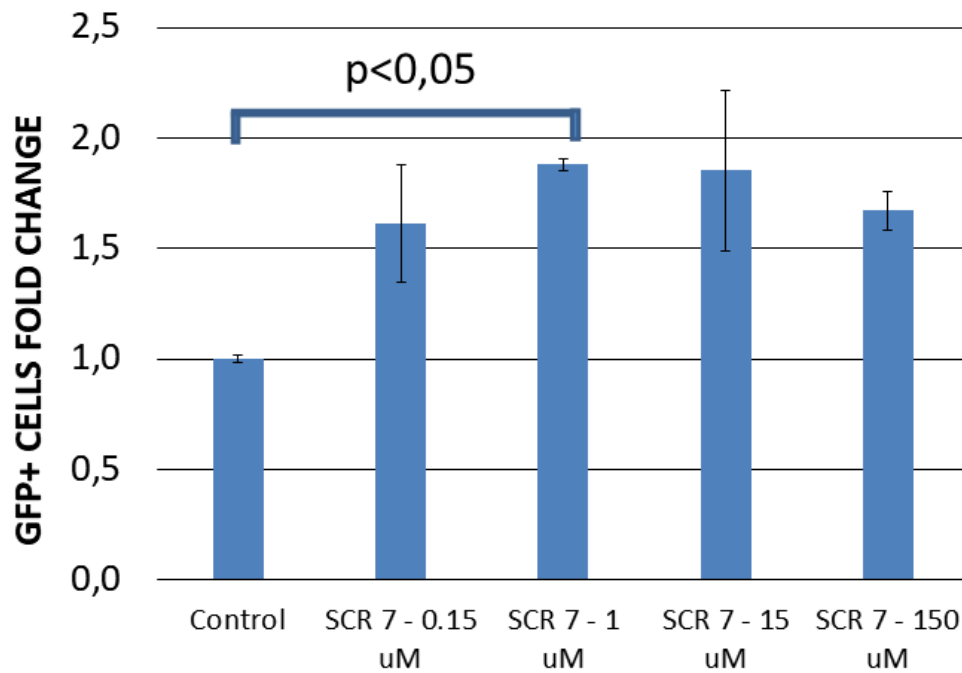

**Figure S6.** Influence of SCR7 added at different concentrations on the number of GFP+ cells after genome editing by Cas9-sgRNA/ssODN. Mean and 95% CI.

### ***Supplementary Methods***

#### ***Microscopy***

Microscopy was performed using an Axio vert. A1 fluorescence microscope (Carl Zeiss, Germany) and Zen2.3 software.

SCAI expression was analyzed using a Leica TCS SP8 Confocal Laser Scanning Microscope (Leica Microsystems, Germany). Images were processed and analyzed using the open-source software CellProfiler version 3.0.0. Cell nuclei and cytoplasm were identified, after which the percentage of positive cells and fluorescence intensity in each cell were measured.

#### ***Immunostaining***

Harvested cells were washed with the Dulbecco's Phosphate-Buffered Saline (DPBS), then transferred into 1.7 ml tubes and fixed with 4% formaldehyde, permeabilized with 0.25% Triton X100 in PBS and blocked with 1% BSA in PBST. After that, the cells were incubated for 30 min at room temperature with primary antibodies (Recombinant Anti-Mad2L2/REV7 antibody [EPR13657], Abcam, UK, 1:70; or Recombinant Anti-SCAI antibody [EPR4128] (ab124688), 1:160). Then the cells were washed with DPBS and incubated for 30 min with secondary antibodies (Alexa Fluor594 goat anti-rabbit IgG(H+L), Invitrogen, USA; 1:150). After washing with DBPS, the cells were analyzed by flow cytometry.

**Table S1.** Oligonucleotides used in the study

| Types of oligos | Description                                                                           | Sequence                                                                                                                                   |
|-----------------|---------------------------------------------------------------------------------------|--------------------------------------------------------------------------------------------------------------------------------------------|
| Primers         | for sequencing of <i>eGFP</i> locus                                                   | F 5'-ACGTAAACGGCCACAAGTTCA-3'<br>R 5'-CTGCCGTCCTCGATGTTGT-3'                                                                               |
|                 | for cloning of <i>eGFPmut</i> cds in lentiviral vector                                | F 5'-GCCTGCTAGCGAGGGCAGAGGAAGTCTTCTAA-3'<br>R 5'-CTTTGTCGACTCACTTGTACAGCTCGTCCATGC<br>CGAGAGTGA-3'                                         |
|                 | for cloning of <i>TurboRFP</i> cds in lentiviral vector                               | F 5'-GTTTGGATCCGCCACCATGGTGGGTGAGGATAG CGT-3'<br>R 5'-GTTTGTAGCGCCTCTGTGCCCCAGTTTGCTAG<br>GGAGGT-3'                                        |
|                 | for RT-PCR of <i>MAD2L2</i> gene                                                      | F 5'-CACTGCGTCAAGCCACTCCT-3'<br>R 5'-CAGCGAGTCTGAGCTGATGG-3'                                                                               |
|                 | for reference house-keeping gene <i>TFRC</i>                                          | F 5'-TCCTTGCATATTCTGGAATCCC-3'<br>R 5'-ATCACGAACTGACCAGCG-3'                                                                               |
|                 | for reference house-keeping gene <i>TBP</i>                                           | F 5'-CGGAGAGTTCTGGGATTGTAC-3'<br>R 5'-GTGGTTCGTGGCTCTCTTATC-3'                                                                             |
|                 | for reference house-keeping gene <i>B2M</i>                                           | F 5'-CTGCCGTGTGAACCATGTGA-3'<br>R 5'-CAATCCAAATGCGGCATCTTC-3'                                                                              |
|                 | For RT-PCR of <i>SCAI</i> gene                                                        | F 5'-CAGAGGTTCTGGTGATAGCAGTC-3'<br>R 5'-CTGCCACTGCTTCTGTCCAT-3'                                                                            |
| Linker sequence | For fusion of <i>Cas9</i> and <i>SCAI</i>                                             | NT: 5'-TCCGGCTCCGAGACCCCCGGCACCTCCGA<br>GTCCGCCACCCCCGAGTCC-3'<br>AA: SGSETPGTSESATPES                                                     |
| gRNA            | guide RNA complementary a part of <i>eGFP</i> coding sequence with mutation p.337delG | 5'-TGTCGCCCTCGAACTTCACT-3'<br>3'-ACAGCGGGAGCTTGAAGTGA-5'                                                                                   |
| ssODN           | single-stranded oligodeoxynucleotide for                                              | 5'-<br>TTCTTTAAGGACGACGGCAACTACAAGACCCGCGCCGAGGTG<br>AAGTTCGAGGGCGACACCCTGGTGAACCGCATCGAGCTGAA<br>GGGCATCGACTTCAAGGAGGACGGCAACATCCTCGGG-3' |

|               |                             |                                                                       |
|---------------|-----------------------------|-----------------------------------------------------------------------|
|               | homology<br>directed repair |                                                                       |
| <b>siRNAs</b> | siRNA_MAD2L<br>2_1          | 5'-CCUCGACUUCUCAGCCUCCUU-3'<br>3'-UUGGAGCUGAAGAGUCGGAGG-5'            |
|               | siRNA_MAD2L<br>2_2          | 5'GUGCUCUUAUCGCCUCUGUdTdT3'<br>3'dTdTTCACGAGAAUAGCGGAGACA5'           |
|               | siRNA_MAD2L<br>2_3          | 5'-GGAUGACCACGCUCACACGdTdT-3'<br>3'-dTdTCCUACUGGUGCGAGUGUGC-5'        |
|               | siRNA_flu                   | 5'FAM –AGGUCGAACUACGGGUCAAdTdC-3'<br>3'-dGdAUCCAGCUUGAUGCCCAGUU-FAM5' |
